# Supplementary material for: Gut Microbiota as a Potential Predictive Biomarker in Relapsing-Remitting Multiple Sclerosis
Source: MDPI journal article supplement (doi:10.3390/genes13050930), 2022-05-23

## SUPPLEMENTARY MATERIALS

### Supplementary Table S1. Microbiota composition at different taxonomic levels.

Supplementary Tables S1a, S1b and S1c show median and quartiles 25% (p25) and 75% (p75) values for all RRMS patients for each phylum, family and genus members identified in the microbiota analysis, respectively.

**Supplementary Table S1a. Phylum**

| <b>Stats</b>           | <b>median</b> | <b>p25</b> | <b>p75</b> |
|------------------------|---------------|------------|------------|
| <i>Firmicutes</i>      | 58.70         | 54.94      | 65.62      |
| <i>Bacteroidetes</i>   | 30.81         | 23.81      | 37.91      |
| <i>Actinobacteria</i>  | 2.82          | 1.17       | 5.15       |
| <i>Proteobacteria</i>  | 2.48          | 1.73       | 3.13       |
| <i>Verrucomicrobia</i> | 0.44          | 0.01       | 3.25       |
| <i>Synergistetes</i>   | 0.02          | 0.00       | 0.07       |
| <i>Lentisphaerae</i>   | 0.01          | 0.00       | 0.02       |
| <i>Euryarchaeota</i>   | 0.01          | 0.00       | 0.18       |

**Supplementary Table S1b. Family**

| <b>Stats</b>               | <b>median</b> | <b>p25</b> | <b>p75</b> |
|----------------------------|---------------|------------|------------|
| <i>Ruminococcaceae*</i>    | 24.31         | 18.29      | 32.38      |
| <i>Bacteroidaceae</i>      | 15.89         | 12.24      | 21.18      |
| <i>Lachnospiraceae*</i>    | 15.87         | 13.31      | 17.40      |
| <i>Porphyromonadaceae</i>  | 5.08          | 3.29       | 7.19       |
| <i>Prevotellaceae</i>      | 3.29          | 0.01       | 8.53       |
| <i>Rikenellaceae</i>       | 2.79          | 1.97       | 3.24       |
| <i>Eubacteriaceae</i>      | 2.56          | 1.63       | 3.81       |
| <i>Oscillospiraceae</i>    | 2.43          | 1.59       | 4.04       |
| <i>Veillonellaceae</i>     | 1.84          | 0.02       | 4.33       |
| <i>Erysipelotrichaceae</i> | 1.75          | 1.32       | 3.32       |
| <i>Acidaminococcaceae</i>  | 1.19          | 0.00       | 1.99       |
| <i>Bifidobacteriaceae</i>  | 1.04          | 0.61       | 3.09       |
| <i>Sutterellaceae</i>      | 1.00          | 0.40       | 1.34       |
| <i>Coriobacteriaceae</i>   | 0.64          | 0.35       | 1.77       |
| <i>Desulfovibrionaceae</i> | 0.55          | 0.40       | 1.06       |
| <i>Akkermansiaceae</i>     | 0.44          | 0.01       | 3.25       |
| <i>Clostridiaceae</i>      | 0.38          | 0.20       | 0.82       |
| <i>Streptococcaceae</i>    | 0.19          | 0.09       | 0.44       |
| <i>Christensenellaceae</i> | 0.15          | 0.05       | 0.56       |
| <i>Defluviitaleaceae</i>   | 0.12          | 0.02       | 1.30       |
| <i>Lactobacillaceae</i>    | 0.10          | 0.00       | 0.49       |
| <i>Eggerthellaceae</i>     | 0.09          | 0.05       | 0.17       |
| <i>Gracilibacteraceae</i>  | 0.05          | 0.00       | 0.46       |
| <i>Enterobacteriaceae</i>  | 0.02          | 0.00       | 0.13       |

**Supplementary Table S1c. Genus**

| <b>Stats</b>                  | <b>median</b> | <b>p25</b> | <b>p75</b> |
|-------------------------------|---------------|------------|------------|
| <i>Bacteroides</i>            | 15.89         | 12.24      | 21.18      |
| <i>Faecalibacterium</i>       | 9.74          | 8.32       | 12.17      |
| <i>Ruminococcus</i> *         | 4.34          | 2.76       | 7.68       |
| <i>Gemmiger</i> *             | 3.33          | 2.55       | 5.67       |
| <i>Roseburia</i>              | 3.17          | 1.48       | 4.99       |
| <i>Alistipes</i>              | 2.79          | 1.97       | 3.24       |
| <i>Eubacterium</i>            | 2.56          | 1.62       | 3.80       |
| <i>Oscillibacter</i>          | 2.43          | 1.59       | 4.04       |
| <i>Lachnoclostridium</i> *    | 2.00          | 1.43       | 2.81       |
| <i>Barnesiella</i>            | 1.97          | 0.70       | 2.40       |
| <i>Parabacteroides</i>        | 1.96          | 1.56       | 3.29       |
| <i>Ruminiclostridium</i>      | 1.82          | 1.13       | 3.58       |
| <i>Blautia</i>                | 1.73          | 1.37       | 2.35       |
| <i>Phascolarctobacterium</i>  | 1.12          | 0.00       | 1.99       |
| <i>Erysipelatoclostridium</i> | 1.10          | 0.36       | 1.75       |
| <i>Bifidobacterium</i>        | 1.04          | 0.61       | 3.09       |
| <i>Fusicatenibacter</i>       | 0.98          | 0.50       | 1.67       |
| <i>Intestinimonas</i>         | 0.70          | 0.30       | 1.15       |
| <i>Dorea</i>                  | 0.58          | 0.38       | 0.71       |
| <i>Desulfovibrio</i>          | 0.55          | 0.40       | 1.06       |
| <i>Collinsella</i>            | 0.54          | 0.25       | 1.77       |
| <i>Sporobacter</i>            | 0.52          | 0.26       | 1.05       |
| <i>Coprococcus</i>            | 0.49          | 0.36       | 0.89       |
| <i>Akkermansia</i>            | 0.44          | 0.01       | 3.25       |
| <i>Tyzzerella</i>             | 0.33          | 0.22       | 0.67       |
| <i>Pseudoflavonifractor</i>   | 0.31          | 0.13       | 0.45       |
| <i>Acetanaerobacterium</i>    | 0.30          | 0.04       | 0.64       |
| <i>Odoribacter</i>            | 0.27          | 0.11       | 0.66       |
| <i>Anaerobacterium</i>        | 0.19          | 0.01       | 0.90       |
| <i>Streptococcus</i> *        | 0.19          | 0.09       | 0.42       |
| <i>Sutterella</i>             | 0.18          | 0.00       | 0.48       |
| <i>Christensenella</i>        | 0.15          | 0.05       | 0.56       |
| <i>Vallitalea</i>             | 0.10          | 0.02       | 1.23       |
| <i>Lactobacillus</i>          | 0.10          | 0.00       | 0.49       |
| <i>Lachnospira</i>            | 0.10          | 0.01       | 0.52       |
| <i>Prevotella</i> *           | 0.09          | 0.01       | 8.53       |
| <i>Parasutterella</i>         | 0.08          | 0.01       | 1.16       |
| <i>Anaerostipes</i>           | 0.08          | 0.05       | 0.38       |
| <i>Dialister</i>              | 0.07          | 0.00       | 3.16       |
| <i>Eisenbergiella</i>         | 0.06          | 0.01       | 0.11       |
| <i>Gracilibacter</i>          | 0.05          | 0.00       | 0.46       |
| <i>Hungatella</i>             | 0.05          | 0.03       | 0.15       |
| <i>Clostridium</i>            | 0.03          | 0.01       | 0.13       |
| <i>Lachnobacterium</i>        | 0.02          | 0.00       | 0.02       |
| <i>Escherichia</i>            | 0.01          | 0.00       | 0.06       |
| <i>Paraprevotella</i>         | 0.00          | 0.00       | 0.27       |

**Supplementary Figure S1. Analysis of cases and controls. Genera Ezakiella and Bilophila.**  
Number of cases and controls with detection of genera sequences and mean log value of sequences for both genera are included.

**Ezakiella**

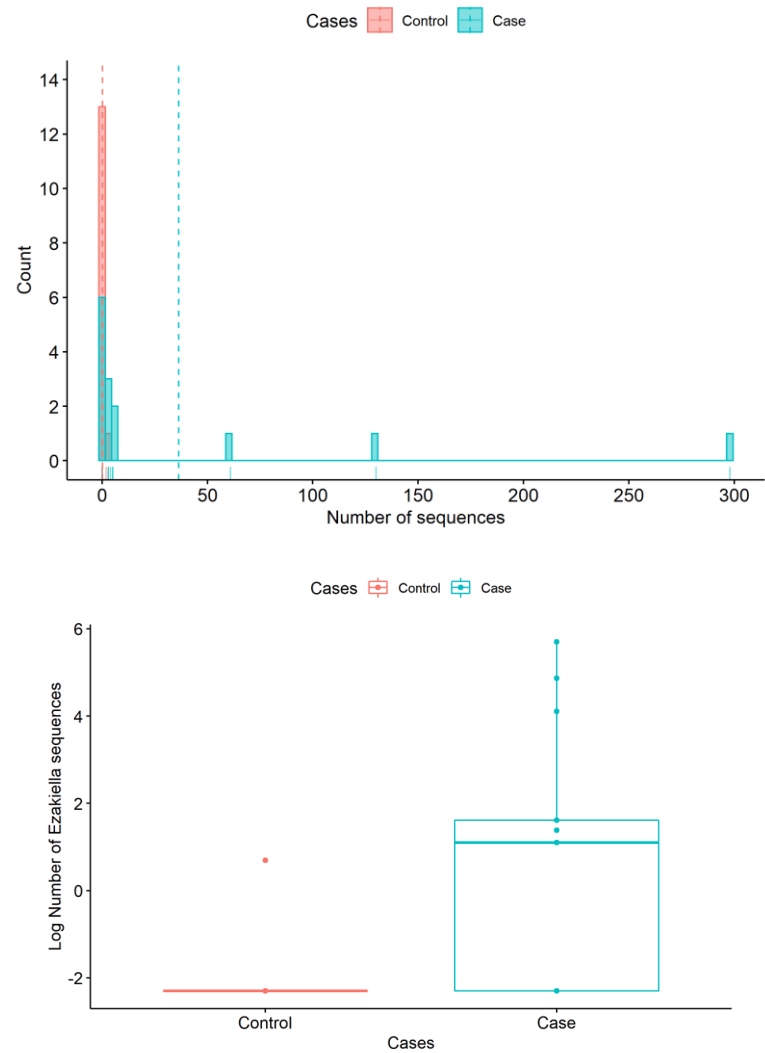

**Bilophila**

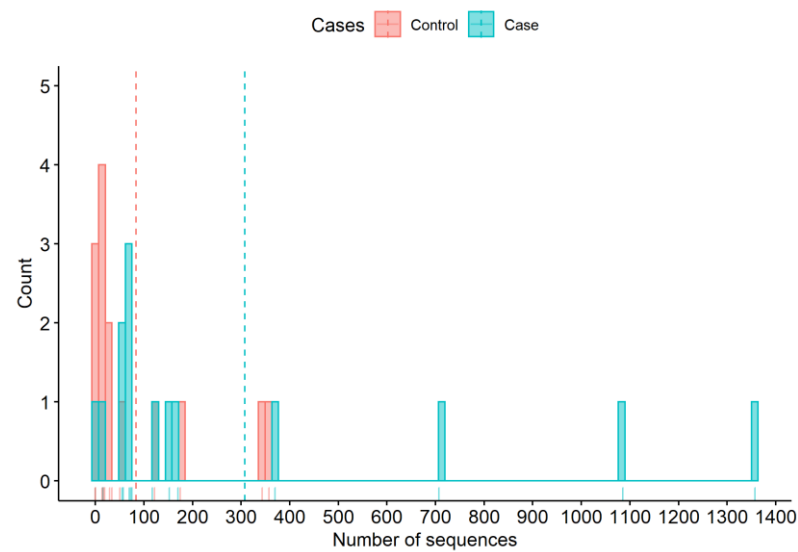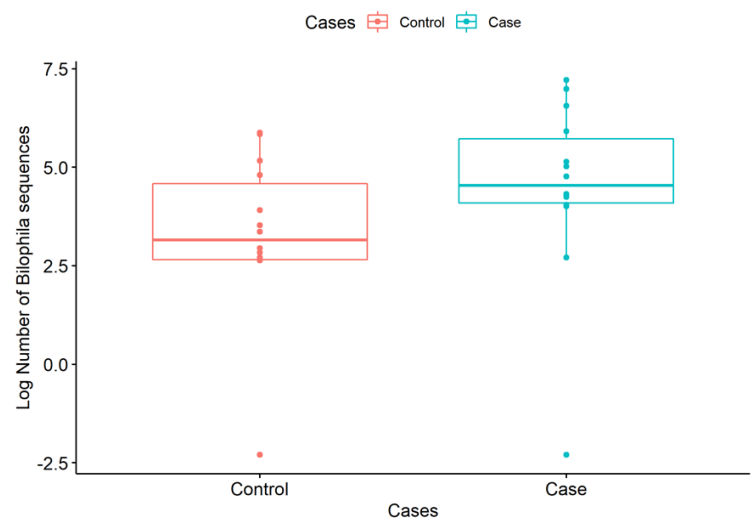

Supplement: s1 [file s1]
